# Supplementary material for: Conceptualising the episodic nature of disability among adults living with Long COVID: a qualitative study
Source: PubMed Central journal article supplement — BMJ Glob Health. 2023 Mar 1;8(3):e011276. doi: 10.1136/bmjgh-2022-011276 (PMC9979585; doi:10.1136/bmjgh-2022-011276), 2023-03-01
Supplement: bmjgh-2022-011276supp002.pdf [file bmjgh-2022-011276supp002.pdf]

Supplemental File 2 – Demographic Questionnaire  
Conceptualising the Episodic Nature of Disability among Adults Living With Long COVID: A Qualitative Study

**Supplemental File 2 - Long COVID Participant Demographic Questionnaire  
Episodic Disability and Long COVID Study**

Participant ID: \_\_\_\_\_

Date : \_\_\_\_\_

The following questions pertain to your background, characteristics, and health. Please complete the following questions below to the best of your ability.

1) What country do you live in?

- Canada
- United States
- Ireland
- United Kingdom

2) What county/region/province/state do you live in?

2) What was the community organization through which you found out about the study?

- Long Haulers Support Group in Canada
- Patient-Led Research Collaborative
- Long COVID Physio
- Long COVID Support
- Long COVID Ireland

3) What is your **age**? (in years): \_\_\_\_\_

4) What is your **sex**? (a question about gender identity will follow)

- Female
- Male
- Intersex
- Other – Please Describe: \_\_\_\_\_

5) Is the gender you identify with the same as your sex registered at birth?

- Yes
- No

6) What is the **gender** you identify with?

- Man
- Woman
- Trans-Man
- Trans-Woman
- Non-Binary
- Gender Non-Conforming
- Two-Spirited
- Other – Please describe: \_\_\_\_\_

Supplemental File 2 – Demographic Questionnaire  
Conceptualising the Episodic Nature of Disability among Adults Living With Long COVID: A Qualitative Study

7) How would you describe your **national identity**?

- British
- English
- Welsh
- Scottish
- Northern Irish
- Irish
- American
- Canadian
- Other – Please describe: \_\_\_\_\_

8) How would you describe your **ethnic group and/or race**?

- Arab, Middle Eastern or North African
- Asian, South Asian, or South East Asian
- Black, Black British, Caribbean, African, or African American
- First Nations, Native American, or Indigenous
- Hispanic or Latino/a/x
- Mixed or Multiple ethnic groups – Please describe: \_\_\_\_\_
- Native Hawaiian or other Pacific Islander
- White
- Other ethnicity/race – Please describe: \_\_\_\_\_

9) Which of the following best describes your **sexual orientation** or sexuality?

- Straight or Heterosexual
- Gay
- Lesbian
- Bisexual
- Asexual
- Pansexual
- Other sexual orientation – Please describe: \_\_\_\_\_

10) What is your current **marital or partnership status**? *Please check only one box.*

- Single, that is, never married and never registered in a civil partnership
- Married
- Separated, but still legally married
- Divorced
- Widowed
- In a registered civil partnership
- Separated, but still legally in a civil partnership
- Formerly in a civil partnership which is now legally dissolved
- Surviving partner from a civil partnership
- Prefer not to answer

11) Do you have any **children**?

- Yes
- No

## Supplemental File 2 – Demographic Questionnaire

## Conceptualising the Episodic Nature of Disability among Adults Living With Long COVID: A Qualitative Study

12a) Do you **live alone** (or alone with pets)?

- Yes  
 No

12b) Please describe who you **currently live with?** Check 'Yes' or 'No' for each of the following:

|                                                                  | Yes                      | No                       |
|------------------------------------------------------------------|--------------------------|--------------------------|
| a) I live with my child/children (dependent)                     | <input type="checkbox"/> | <input type="checkbox"/> |
| b) I live with my adult child/children                           | <input type="checkbox"/> | <input type="checkbox"/> |
| c) I live with my partner or spouse                              | <input type="checkbox"/> | <input type="checkbox"/> |
| d) I live with my siblings                                       | <input type="checkbox"/> | <input type="checkbox"/> |
| e) I live with my parents                                        | <input type="checkbox"/> | <input type="checkbox"/> |
| f) I live with my extended family                                | <input type="checkbox"/> | <input type="checkbox"/> |
| g) I live with unrelated people (e.g. with friends or roommates) | <input type="checkbox"/> | <input type="checkbox"/> |

13) What is your current **employment status?** Please check one that best describes your employment status.

- Full-time employment (30 hours or more per week)  
 Part-time employment (less than 30 hours per week)  
 Volunteering (working without pay)  
 Student (either part-time or full-time)  
 Retired  
 I am retired but also earning some part-time income  
 On disability  
 Unemployed / not working, but seeking work  
 Unemployed / not working, not seeking work  
 Other – Please describe \_\_\_\_\_

14) Has your **employment changed** since living with **Long COVID?**

- No, unchanged employment status  
 Yes, I now work reduced or altered hours due to Long COVID  
 Yes, I changed my employment role or job due to Long COVID  
 Yes, I am unable to work/on a leave of absence from work due to Long COVID  
 Yes, I lost my job or I am now unemployed due to Long COVID  
 Yes, my employment status has changed but not directly due to Long COVID

15) What is the main source of your **personal income?**

- Full-time Employment  
 Part-time Employment  
 Self-Employment  
 Disability (e.g Disability Living Allowance, Severe Disablement Allowance, Incapacity Benefit etc.)  
 Social Security / Social Welfare / Benefits  
 Worker's Compensation  
 Employment Insurance / Long-Term Disability  
 Retirement Pension  
 Basic State Pension/State Second Pension (S2P)  
 Informal street-related work (such as pan handling)  
 Under the table work  
 Student loans  
 Other – Please specify: \_\_\_\_\_

16) What is the highest level of **education** you have completed? Please check only one box.

## Supplemental File 2 – Demographic Questionnaire

## Conceptualising the Episodic Nature of Disability among Adults Living With Long COVID: A Qualitative Study

- No formal education
- Completed secondary / high school
- Completed trade or technical training (received certification / diploma)
- Completed college (received degree or diploma)
- Completed university (received degree)
- Post-graduate education

17) Do you look after, or **give any help or support** to, a dependent child/children, someone living with a long-term physical or mental health conditions or illnesses, or someone with problems related to old age? *Please check only one box.*

- No
- Yes, 9 hours a week or less
- Yes, 10 to 19 hours a week
- Yes, 20 to 34 hours a week
- Yes, 35 to 49 hours a week
- Yes, 50 or more hours a week

18a) Do you **receive any help or support** because of long-term physical or mental health conditions or illnesses, or problems related to age? *Please check only one box.*

- No
- Yes, 9 hours a week or less
- Yes, 10 to 19 hours a week
- Yes, 20 to 34 hours a week
- Yes, 35 to 49 hours a week
- Yes, 50 or more hours a week

18b) (*Conditional Question*) Is the **help or support** you receive new because of Long COVID?

- Yes
- No

19a) What is your current COVID-19 **vaccination status**?

- Not vaccinated
- Partially vaccinated (i.e., 1 dose received)
- Fully vaccinated without a booster dose (i.e., 2 doses received or 1 dose of Janssen/Johnson & Johnson)
- Fully vaccinated with a booster dose (i.e., 3 doses received or 2 doses of Janssen/Johnson & Johnson)

19b) (*Conditional Question*) What was the **last vaccine** you received?

- Pfizer-BioNTech
- Moderna
- AstraZeneca/COVISHIELD
- Janssen (Johnson & Johnson)
- Other

19c) (*Conditional Question*) What was the date of your most recent vaccine (DD/MM/YY)? \_\_\_\_\_

## Supplemental File 2 – Demographic Questionnaire

## Conceptualising the Episodic Nature of Disability among Adults Living With Long COVID: A Qualitative Study

20) Listed below are some **symptoms** that individuals may experience when living with Long COVID. For each one, check **'Yes, Have Experience Since COVID-19'** if you have ever experienced the symptom since having COVID-19, **'Yes, Also Living with Before COVID-19'** if you experienced the symptom prior to having COVID-19, and **'No'** if you have not experienced the symptoms. We are interested in knowing if you have experienced these symptoms now and before, even if they have improved, resolved, or been managed with medications or other treatments.

| Symptoms                                                                                       | Yes, Have Experienced Since COVID-19 | Yes, Also Living with Before COVID-19 | No                       |
|------------------------------------------------------------------------------------------------|--------------------------------------|---------------------------------------|--------------------------|
| Fatigue or Exhaustion                                                                          | <input type="checkbox"/>             | <input type="checkbox"/>              | <input type="checkbox"/> |
| Post-Exertional Symptom Exacerbation or Post-Exertional Malaise (PEM) *                        | <input type="checkbox"/>             | <input type="checkbox"/>              | <input type="checkbox"/> |
| Shortness of breath (dyspnea) or increased respiratory effort                                  | <input type="checkbox"/>             | <input type="checkbox"/>              | <input type="checkbox"/> |
| Difficulty thinking or concentrating (also known as Brain Fog)                                 | <input type="checkbox"/>             | <input type="checkbox"/>              | <input type="checkbox"/> |
| Cough                                                                                          | <input type="checkbox"/>             | <input type="checkbox"/>              | <input type="checkbox"/> |
| Chest tightness or pain                                                                        | <input type="checkbox"/>             | <input type="checkbox"/>              | <input type="checkbox"/> |
| Headache                                                                                       | <input type="checkbox"/>             | <input type="checkbox"/>              | <input type="checkbox"/> |
| Palpitations and/or high heart rate (tachycardia)                                              | <input type="checkbox"/>             | <input type="checkbox"/>              | <input type="checkbox"/> |
| Painful joints (arthralgia)                                                                    | <input type="checkbox"/>             | <input type="checkbox"/>              | <input type="checkbox"/> |
| Painful muscles (myalgia)                                                                      | <input type="checkbox"/>             | <input type="checkbox"/>              | <input type="checkbox"/> |
| Numbness or loss of sensation (paresthesia)                                                    | <input type="checkbox"/>             | <input type="checkbox"/>              | <input type="checkbox"/> |
| Abdominal pain                                                                                 | <input type="checkbox"/>             | <input type="checkbox"/>              | <input type="checkbox"/> |
| Feeling sick (nausea)                                                                          | <input type="checkbox"/>             | <input type="checkbox"/>              | <input type="checkbox"/> |
| Diarrhea                                                                                       | <input type="checkbox"/>             | <input type="checkbox"/>              | <input type="checkbox"/> |
| Reduced appetite (anorexia)                                                                    | <input type="checkbox"/>             | <input type="checkbox"/>              | <input type="checkbox"/> |
| Increased appetite                                                                             |                                      |                                       |                          |
| Sleep difficulties (insomnia)                                                                  | <input type="checkbox"/>             | <input type="checkbox"/>              | <input type="checkbox"/> |
| Fever                                                                                          | <input type="checkbox"/>             | <input type="checkbox"/>              | <input type="checkbox"/> |
| Lightheadedness (pre-syncope)                                                                  | <input type="checkbox"/>             | <input type="checkbox"/>              | <input type="checkbox"/> |
| Fainting (syncope)                                                                             | <input type="checkbox"/>             | <input type="checkbox"/>              | <input type="checkbox"/> |
| Dizziness                                                                                      | <input type="checkbox"/>             | <input type="checkbox"/>              | <input type="checkbox"/> |
| Pain                                                                                           | <input type="checkbox"/>             | <input type="checkbox"/>              | <input type="checkbox"/> |
| Skin rashes                                                                                    | <input type="checkbox"/>             | <input type="checkbox"/>              | <input type="checkbox"/> |
| Circulation changes such as cold hands or feet                                                 | <input type="checkbox"/>             | <input type="checkbox"/>              | <input type="checkbox"/> |
| Sensation changes such as pins and needles in the hands, feet, arms and/or legs                | <input type="checkbox"/>             | <input type="checkbox"/>              | <input type="checkbox"/> |
| Neurological changes such as problems moving limbs, joints or muscles                          | <input type="checkbox"/>             | <input type="checkbox"/>              | <input type="checkbox"/> |
| Mood changes                                                                                   | <input type="checkbox"/>             | <input type="checkbox"/>              | <input type="checkbox"/> |
| Taste and smell changes (dysgeusia and anosmia)                                                | <input type="checkbox"/>             | <input type="checkbox"/>              | <input type="checkbox"/> |
| Menstrual cycle irregularities                                                                 | <input type="checkbox"/>             | <input type="checkbox"/>              | <input type="checkbox"/> |
| Bowel and bladder control changes                                                              |                                      |                                       |                          |
| Erectile dysfunction including pain with erections or change to shape of the penis (Peyronies) | <input type="checkbox"/>             | <input type="checkbox"/>              | <input type="checkbox"/> |

\* Post-Exertional Symptom Exacerbation is the worsening of symptoms following even minor physical, mental, or social exertion, with symptoms typically worsening for 12 to 48 hours after activity and lasting days or even weeks.

## Supplemental File 2 – Demographic Questionnaire

## Conceptualising the Episodic Nature of Disability among Adults Living With Long COVID: A Qualitative Study

21) Listed below are some **health conditions** that individuals may live with in addition to Long COVID. For each one, check **'Yes, Now'** if you are currently living with the condition, **'Yes, Also Living with Before COVID-19'** if you lived with the condition prior to having COVID-19, and **'No'** if you do not live with the condition. We are interested in knowing if you are living with these conditions, even if you are managing them with medications.

| Health Conditions                                                                                                                                                                                           | Yes, Now                 | Yes, Also Living with Before COVID-19 | No                       |
|-------------------------------------------------------------------------------------------------------------------------------------------------------------------------------------------------------------|--------------------------|---------------------------------------|--------------------------|
| a) Addiction or Substance Use Disorder (e.g. alcohol, drugs,)                                                                                                                                               | <input type="checkbox"/> | <input type="checkbox"/>              | <input type="checkbox"/> |
| b) Anemia (Low red blood cells or hemoglobin in your blood)                                                                                                                                                 | <input type="checkbox"/> | <input type="checkbox"/>              | <input type="checkbox"/> |
| c) Auto-immune disease such as systemic lupus, auto-immune hepatitis, multiple sclerosis, or rheumatoid arthritis (typically requiring immune suppressive medications for treatment)                        | <input type="checkbox"/> | <input type="checkbox"/>              | <input type="checkbox"/> |
| d) Cancer, Please specify: _____                                                                                                                                                                            | <input type="checkbox"/> | <input type="checkbox"/>              | <input type="checkbox"/> |
| e) Cardiovascular disease (e.g. coronary artery disease, heart attack, angina, stroke, arrhythmia (irregular heart beat)                                                                                    | <input type="checkbox"/> | <input type="checkbox"/>              | <input type="checkbox"/> |
| f) Persistent Pain – Joint (e.g. arthritis)                                                                                                                                                                 | <input type="checkbox"/> | <input type="checkbox"/>              | <input type="checkbox"/> |
| g) Persistent Pain – Neuropathic (e.g. peripheral neuropathy or sensation changes in the hands, feet, arms and/or legs)                                                                                     | <input type="checkbox"/> | <input type="checkbox"/>              | <input type="checkbox"/> |
| h) Persistent Pain – Soft Tissue (muscle pain)                                                                                                                                                              | <input type="checkbox"/> | <input type="checkbox"/>              | <input type="checkbox"/> |
| i) Cognitive decline (e.g. memory loss, confusion, trouble thinking clearly or solving day-to-day problems)                                                                                                 | <input type="checkbox"/> | <input type="checkbox"/>              | <input type="checkbox"/> |
| j) Diabetes                                                                                                                                                                                                 | <input type="checkbox"/> | <input type="checkbox"/>              | <input type="checkbox"/> |
| k) Eye disorder (e.g. glaucoma, macular degeneration)                                                                                                                                                       | <input type="checkbox"/> | <input type="checkbox"/>              | <input type="checkbox"/> |
| l) Fibromyalgia                                                                                                                                                                                             | <input type="checkbox"/> | <input type="checkbox"/>              | <input type="checkbox"/> |
| m) Gastrointestinal Conditions (e.g. stomach ulcers, irritable bowel syndrome, diarrhea, constipation, severe heart burn)                                                                                   | <input type="checkbox"/> | <input type="checkbox"/>              | <input type="checkbox"/> |
| n) Hearing difficulty (have or need hearing aid(s))                                                                                                                                                         | <input type="checkbox"/> | <input type="checkbox"/>              | <input type="checkbox"/> |
| o) HIV                                                                                                                                                                                                      | <input type="checkbox"/> | <input type="checkbox"/>              | <input type="checkbox"/> |
| p) Hepatitis B co-infection                                                                                                                                                                                 | <input type="checkbox"/> | <input type="checkbox"/>              | <input type="checkbox"/> |
| q) Hepatitis C co-infection                                                                                                                                                                                 | <input type="checkbox"/> | <input type="checkbox"/>              | <input type="checkbox"/> |
| <i>a. If no to p), were you living with Hepatitis C in the past and treated?</i>                                                                                                                            | <input type="checkbox"/> | <input type="checkbox"/>              | <input type="checkbox"/> |
| r) High blood pressure                                                                                                                                                                                      | <input type="checkbox"/> | <input type="checkbox"/>              | <input type="checkbox"/> |
| s) High Cholesterol (elevated levels of cholesterol in the blood(hypercholesterolemia)                                                                                                                      | <input type="checkbox"/> | <input type="checkbox"/>              | <input type="checkbox"/> |
| t) History of an organ transplant                                                                                                                                                                           | <input type="checkbox"/> | <input type="checkbox"/>              | <input type="checkbox"/> |
| u) HPV (human papillomavirus; e.g., genital warts, or found on abnormal pap smears)                                                                                                                         | <input type="checkbox"/> | <input type="checkbox"/>              | <input type="checkbox"/> |
| v) Kidney disease                                                                                                                                                                                           | <input type="checkbox"/> | <input type="checkbox"/>              | <input type="checkbox"/> |
| w) Liver disease                                                                                                                                                                                            | <input type="checkbox"/> | <input type="checkbox"/>              | <input type="checkbox"/> |
| x) Lung Disease (such as Chronic Obstructive Pulmonary Disease (COPD). Asthma, chronic bronchitis, emphysema)                                                                                               | <input type="checkbox"/> | <input type="checkbox"/>              | <input type="checkbox"/> |
| y) Mental health condition (e.g. depression, anxiety)                                                                                                                                                       | <input type="checkbox"/> | <input type="checkbox"/>              | <input type="checkbox"/> |
| z) Obesity (when excess body fat has accumulated to the extent that it has adverse effects on your health; or when body mass index (which compares weight and height) is greater than 30kg/m <sup>2</sup> ) | <input type="checkbox"/> | <input type="checkbox"/>              | <input type="checkbox"/> |

## Supplemental File 2 – Demographic Questionnaire

## Conceptualising the Episodic Nature of Disability among Adults Living With Long COVID: A Qualitative Study

|                                                                           |                          |                          |                          |
|---------------------------------------------------------------------------|--------------------------|--------------------------|--------------------------|
| aa) Osteoarthritis (e.g. joint disease caused by loss of joint cartilage) | <input type="checkbox"/> | <input type="checkbox"/> | <input type="checkbox"/> |
| bb) Osteopenia or osteoporosis (e.g. decreased bone density)              | <input type="checkbox"/> | <input type="checkbox"/> | <input type="checkbox"/> |
| cc) Parkinson's Disease (or Parkinsonism)                                 | <input type="checkbox"/> | <input type="checkbox"/> | <input type="checkbox"/> |
| cc) Peripheral artery disease                                             | <input type="checkbox"/> | <input type="checkbox"/> | <input type="checkbox"/> |
| dd) Problems urinating (incontinence or prostate enlargement)             | <input type="checkbox"/> | <input type="checkbox"/> | <input type="checkbox"/> |
| ee) Trouble sleeping (insomnia)                                           | <input type="checkbox"/> | <input type="checkbox"/> | <input type="checkbox"/> |
| ff) Obstructive sleep apnea                                               |                          |                          |                          |
| gg) Other, Please describe _____                                          | <input type="checkbox"/> | <input type="checkbox"/> | <input type="checkbox"/> |

**Health and COVID Specific Questions**

The following questions pertain to your general health and living with Long COVID.

22) Do you have any **physical or mental health conditions** or illnesses lasting or expected to last 12 months or more?

- Yes  
 No

23) Do any of your conditions or illnesses **reduce your ability to carry out day-to-day-activities** (e.g., getting dressed, preparing and eating meals, carrying out household tasks, shopping, interacting with family or colleagues, etc.)? *Please check only one box.*

- Yes, a lot  
 Yes, a little  
 Not at all

24) How is **your health in general now**? *Please check only one box.*

- Very good  
 Good  
 Fair  
 Bad  
 Very bad

25) **Compared to one year ago**, how would you rate your health in general now? *Please check only one box.*

- Much better now than one year ago  
 Somewhat better now than one year ago  
 About the same as one year ago  
 Somewhat worse than one year ago  
 Much worse than one year ago

26) **When did you first develop symptoms of acute COVID-19** or symptoms consistent with the SARS-CoV-2 virus? (Recorded as month and year eg: March 2020):

Month: \_\_\_\_\_ Year: \_\_\_\_\_

Supplemental File 2 – Demographic Questionnaire  
Conceptualising the Episodic Nature of Disability among Adults Living With Long COVID: A Qualitative Study

27) During the initial period of COVID-19, **how were your symptoms managed?** *Check all that apply.*

- I remained at home and received no healthcare support
- I remained at home and was supported by a General Practitioner (GP) or Primary Care Provider
- I remained at home and was supported by other healthcare support
- I was admitted to hospital
- I was admitted to critical or intensive care

28a) Have you been **tested for COVID-19** and received a **positive test result**?

- No, I have not been tested
- No, I have been tested and my results were negative (eg: COVID-19 not detected)
- Yes, positive PCR test (eg: swab test)
- Yes, positive antigen test (eg: rapid test)
- Yes, positive antibody test (eg: blood test)

28b) (*Conditional Question*) Has not being tested or not having a positive test result affected your access to any Long COVID services or support?

- No
- Yes – Please describe: \_\_\_\_\_

29) **How long** have you been living with **Long COVID**? years: \_\_\_\_\_ months: \_\_\_\_\_

30a) Have you experienced **relapses** in your symptoms?

- Yes
- No

30b) (*Conditional Question*) What were the **triggers** of your relapses?

- Physical exertion such as daily activities performed in day-to-day life
- Exercise such as sports, running, swimming or other activities to improve health and fitness
- Mental or cognitive exertion such as online meetings, work, reading, or watching TV
- Social exertion such as being around family, friends, or work colleagues
- Stress
- Menstruation
- Alcohol
- Caffeine
- Weather conditions (i.e., heat)
- Employment responsibilities
- Home, household, or family responsibilities
- Other triggers – Please describe \_\_\_\_\_
